# Supplementary material for: Effects of Land Use/Cover Change on the Ecosystem Service Values in the Greater Bay Area of China Accounting for Spatiotemporal Complexity
Source: Hindawi journal article supplement (doi:10.1155/2022/7734221), 2022-01-01
Supplement: f1 [file 7734221.f1.zip]

Archive with 2 entries (2 files):
- 7734221.f1/Supplementary materials.docx
- 7734221.f1/Table S1-S5.docx
