# Supplementary material for: Effects of Land Use/Cover Change on the Ecosystem Service Values in the Greater Bay Area of China Accounting for Spatiotemporal Complexity
Source: Hindawi journal article supplement (doi:10.1155/2022/7734221), 2022-01-01
Supplement: f1 [file 7734221.f1.zip › 7734221.f1/Supplementary materials.docx]

**Graphical Abstract**


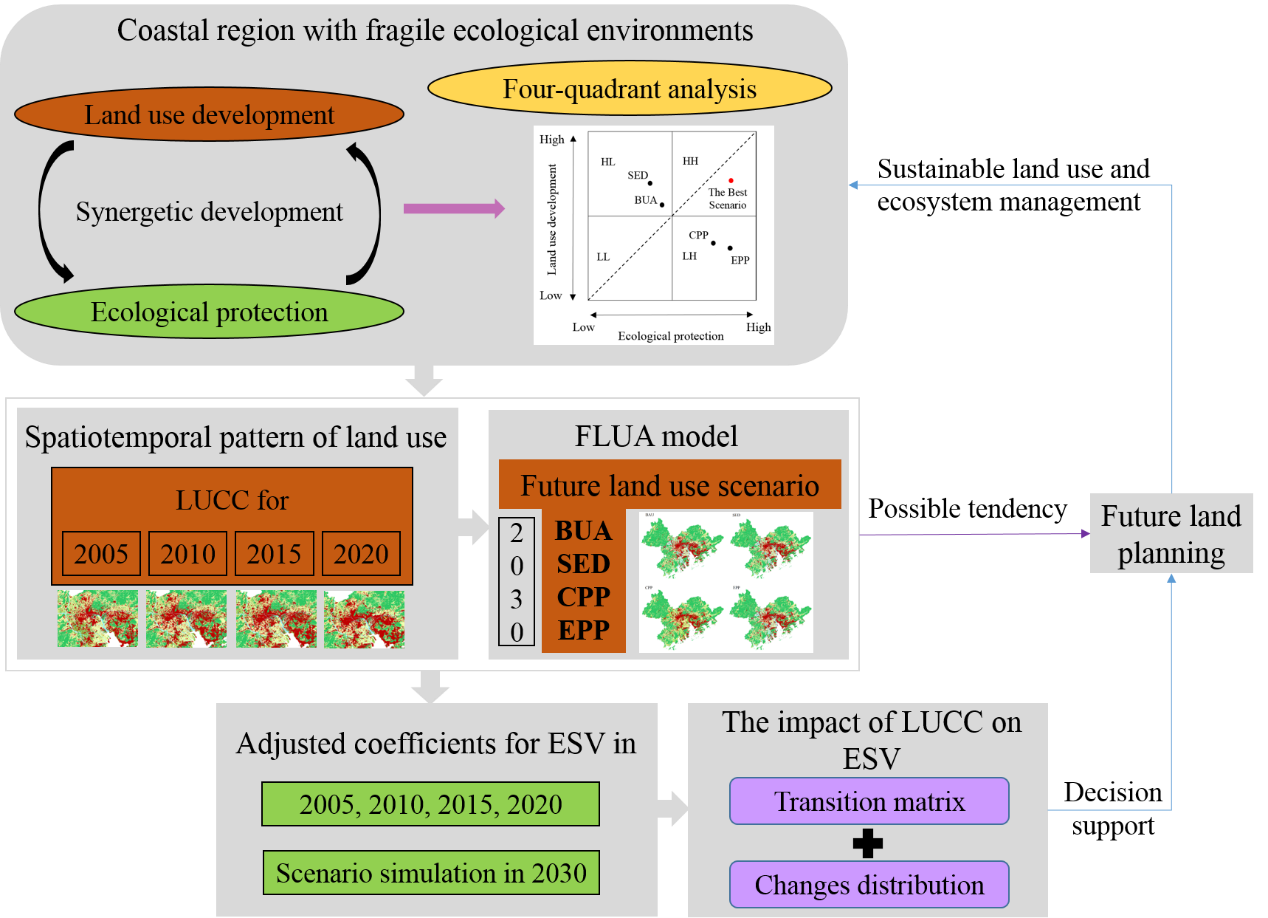


**Highlights**

Urbanization will continue in 2030 under the multiple scenario simulations in the GBA. A large proportion of the population greatly benefits from providing highly diverse ecosystem services typical of coastal regions.

Coastal ecosystems and their related ecosystem services are highly susceptible to LUCC and climate change.
