# Supplementary material for: Effects of Land Use/Cover Change on the Ecosystem Service Values in the Greater Bay Area of China Accounting for Spatiotemporal Complexity
Source: Hindawi journal article supplement (doi:10.1155/2022/7734221), 2022-01-01
Supplement: f1 [file 7734221.f1.zip › 7734221.f1/Table S1-S5.docx]

Table S1: The ROC of logistic regression

|  | Farmland | Forestland | Grassland | Water body | Wetland | Built-up land | Unused land |
| --- | --- | --- | --- | --- | --- | --- | --- |
| ROC | 0.90 | 0.98 | 0.82 | 0.86 | 0.86 | 0.82 | 0.74 |

Table S2: The change of land use and ecosystem service value in BUA scenario in 2030

| BUA | Farmland | Forestland | Grassland | Water body | Wetland | Built-up land | Unused land | Total |
| --- | --- | --- | --- | --- | --- | --- | --- | --- |
| Land use conversion (km2) | | | | | | | | |
| Farmland |  | 37.41 | 22.61 | 32.82 | 1.18 | 468.24 |  | 562.26 |
| Forestland | 0.04 |  | 93.74 |  |  | 0.01 |  | 93.79 |
| Grassland | 17.02 | 7.88 |  |  |  | 15.51 |  | 40.41 |
| Water body | 91.98 |  | 4.66 |  | 2.54 | 0.54 |  | 99.72 |
| Wetland | 1.71 |  | 0.12 | 0.88 |  |  |  | 2.71 |
| Built-up land | |  |  |  |  |  |  | 0.00 |
| Unused land | 0.06 | 0.01 | 0.02 |  |  | 0.02 |  | 0.11 |
| Total | 110.80 | 45.29 | 121.17 | 33.70 | 3.72 | 484.33 | 0.00 | 799.01 |
| ESV transfer change (108 yuan) | | | | | | | | |
| Farmland | 0.00 | 4.85 | 1.59 | 8.67 | 0.12 | -3.95 |  | 11.28 |
| Forestland | -0.01 | 0.00 | -5.57 |  |  | 0.00 |  | -5.58 |
| Grassland | -1.19 | 0.47 | 0.00 |  |  | -1.22 |  | -1.94 |
| Water body | -24.31 |  | -0.91 | 0.00 | -0.41 | -0.15 |  | -25.77 |
| Wetland | -0.18 |  | 0.00 | 0.14 | 0.00 |  |  | -0.04 |
| Built-up land |  |  |  |  | 0.00 |  | 0.00 |  |
| Unused land | 0.00 | 0.00 | 0.00 |  |  | 0.00 | 0.00 | 0.00 |
| Total | -25.69 | 5.32 | -4.90 | 8.81 | -0.28 | -5.32 | 0.00 | -22.05 |

Table S3: The change of land use and ecosystem service value in SED scenario in 2030

| SED | Farmland | Forestland | Grassland | Water body | Wetland | Built-up land | Unused land | Total |
| --- | --- | --- | --- | --- | --- | --- | --- | --- |
|  | Land use conversion (km2) | | | | | | | |
| Farmland |  |  |  |  |  | 256.00 |  | 256.00 |
| Forestland | 209.76 |  |  |  |  | 162.71 |  | 372.47 |
| Grassland | 4.16 |  |  |  |  | 4.99 |  | 9.16 |
| Water body | 18.98 | 10.02 | 1.59 |  | 0.94 | 35.37 |  | 66.90 |
| Wetland | 1.80 | 0.70 | 10.36 | 0.88 |  | 0.31 |  | 14.04 |
| Built-up land | |  |  |  |  |  |  | 0.00 |
| Unused land | 0.11 | 0.04 | 1.01 |  |  | 0.02 |  | 1.17 |
| Total | 234.81 | 10.76 | 12.96 | 0.88 | 0.94 | 459.40 | 0.00 | 719.75 |
|  | ESV transfer change in BUA scenario (108 yuan) | | | | | | | |
| Farmland | 0.00 |  |  |  |  | -2.16 |  | -2.16 |
| Forestland | -27.18 | 0.00 |  |  |  | -22.46 |  | -49.64 |
| Grassland | -0.29 |  | 0.00 |  |  | -0.39 |  | -0.68 |
| Water body | -5.02 | -1.35 | -0.31 | 0.00 | -0.15 | -9.65 |  | -16.47 |
| Wetland | -0.19 | 0.02 | -0.36 | 0.14 | 0.00 | -0.04 |  | -0.42 |
| Built-up land |  |  |  |  | 0.00 |  | 0.00 |  |
| Unused land | 0.00 | 0.01 | 0.08 |  |  | 0.00 | 0.00 | 0.09 |
| Total | -32.68 | -1.33 | -0.59 | 0.14 | -0.15 | -34.70 | 0.00 | -69.30 |

Table S4: The change of land use and ecosystem service value in CPP scenario in 2030

| CPP | Farmland | Forestland | Grassland | Water body | Wetland | Built-up land | Unused land | Total |
| --- | --- | --- | --- | --- | --- | --- | --- | --- |
|  | Land use conversion (km2) | | | | | | | |
| Farmland |  |  |  |  |  |  |  | 0.00 |
| Forestland | 43.86 |  | 163.23 | 0.02 |  | 0.07 |  | 207.17 |
| Grassland | 4.42 | 51.82 |  | 6.54 | 0.39 | 28.10 |  | 91.27 |
| Water body | 15.98 | 0.05 | 8.51 |  | 12.68 | 0.02 |  | 37.25 |
| Wetland | 0.32 |  | 0.25 | 15.54 |  |  |  | 16.11 |
| Built-up land | |  |  |  |  |  |  | 0.00 |
| Unused land | | 1.22 | 0.03 | 0.03 |  | 1.18 |  | 2.46 |
| Total | 64.58 | 53.09 | 172.02 | 22.13 | 13.08 | 29.37 | 0.00 | 354.26 |
|  | ESV transfer change in BUA scenario (108 yuan) | | | | | | | |
| Farmland | 0.00 |  |  |  |  |  |  | 0.00 |
| Forestland | -5.68 | 0.00 | -9.70 | 0.00 |  | -0.01 |  | -15.39 |
| Grassland | -0.31 | 3.08 | 0.00 | 1.27 | 0.01 | -2.21 |  | 1.85 |
| Water body | -4.22 | -0.01 | -1.65 | 0.00 | -2.03 | -0.01 |  | -7.92 |
| Wetland | -0.03 |  | -0.01 | 2.48 | 0.00 |  |  | 2.44 |
| Built-up p land |  |  |  |  | 0.00 |  | 0.00 |  |
| Unused land | 0.17 | 0.00 | 0.01 |  | 0.00 | 0.00 | 0.18 |  |
| Total | -10.25 | 3.24 | -11.36 | 3.76 | -2.01 | -2.22 | 0.00 | -18.84 |

Table S5: The change of land use and ecosystem service value in EPP scenario in 2030

| EPP | Farmland | Forestland | Grassland | Water body | Wetland | Built-up land | Unused land | Total |
| --- | --- | --- | --- | --- | --- | --- | --- | --- |
|  | Land use conversion (km2) | | | | | | | |
| Farmland |  | 37.17 | 29.76 | 34.86 | 1.36 | 348.34 | 0.01 | 451.51 |
| Forestland |  |  |  |  |  |  |  | 0.00 |
| Grassland |  | 9.90 |  | 0.99 | 0.08 |  |  | 10.98 |
| Water body |  |  |  |  | 2.28 |  |  | 2.28 |
| Wetland |  |  |  | 0.93 |  |  |  | 0.93 |
| Built-up land | |  |  |  |  |  |  | 0.00 |
| Unused land | 0.09 | 0.02 | 0.94 |  |  | 1.43 |  | 2.47 |
| Total | 0.09 | 47.09 | 30.70 | 36.79 | 3.72 | 349.77 | 0.01 | 468.17 |
|  | ESV transfer change in BUA scenario (108 yuan) | | | | | | | |
| Farmland | 0.00 | 4.82 | 2.09 | 9.21 | 0.14 | -2.94 | 0.00 | 13.32 |
| Forestland |  | 0.00 |  |  |  |  |  | 0.00 |
| Grassland |  | 0.59 | 0.00 | 0.19 | 0.00 |  |  | 0.78 |
| Water body |  |  |  | 0.00 | -0.36 |  |  | -0.36 |
| Wetland |  |  |  | 0.18 | 0.00 |  |  | 0.18 |
| Built-up land |  |  |  |  | 0.00 |  | 0.00 |  |
| Unused land | 0.00 | 0.00 | 0.07 |  |  | 0.00 | 0.00 | 0.08 |
| Total | 0.00 | 5.41 | 2.16 | 9.59 | -0.22 | -2.94 | 0.00 | 14.00 |
